# Supplementary material for: Bioaugmentation of Bacillus amyloliquefaciens-Bacillus kochii co-cultivation to improve sensory qualities of flue-cured tobacco
Source: Research Square preprint supplement (doi:10.21203/rs.3.rs-626237/v1), 2021-06-18
Supplement: Supplementary file 1 [file 46a90f353b2166c4c4bf79d9.docx]

**Bioaugmentation *of Bacillus amyloliquefaciens*-*Bacillus kochii*** **co-cultivation to improve sensory qualities of flue-cured tobacco**

Xinying Wua,b,d Pengcheng zhua,c, Dongliang Lic, Tainfei Zheng a,b, Wen Caic, Jianghua Lia,b, Baoyu Zhanga,b, Beibei zhuc, Juan Zhanga,b *, Guocheng Dua,b*

*a:**School of Biotechnology, Jiangnan University, 1800 Lihu Road, Wuxi* *214122, China*

*b: Key laboratory of industrial biotechnology, Ministry of education, Jiangnan University, Wuxi, 214122, China*

*c: Technical Research Center, China Tobacco Sichuan industrial Co., Ltd.,56 Chenglong Road, Chengdu 610000, China*

*d: School of Liquor and Food Engineering, Guizhou University, Guiyang 550025, China*

* Corresponding author.

Guocheng Du:

*E-mail addresses*: [gcdu@jiangnan.edu.cn](mailto:gcdu@jiangnan.edu.cn) (gc. Du).

Juan Zhang:

*E-mail addresses*: [zhangj@jiangnan.edu.cn](mailto:zhangj@jiangnan.edu.cn) (J. Zhang).

**Journal name：Archives of Microbiology**

**A**


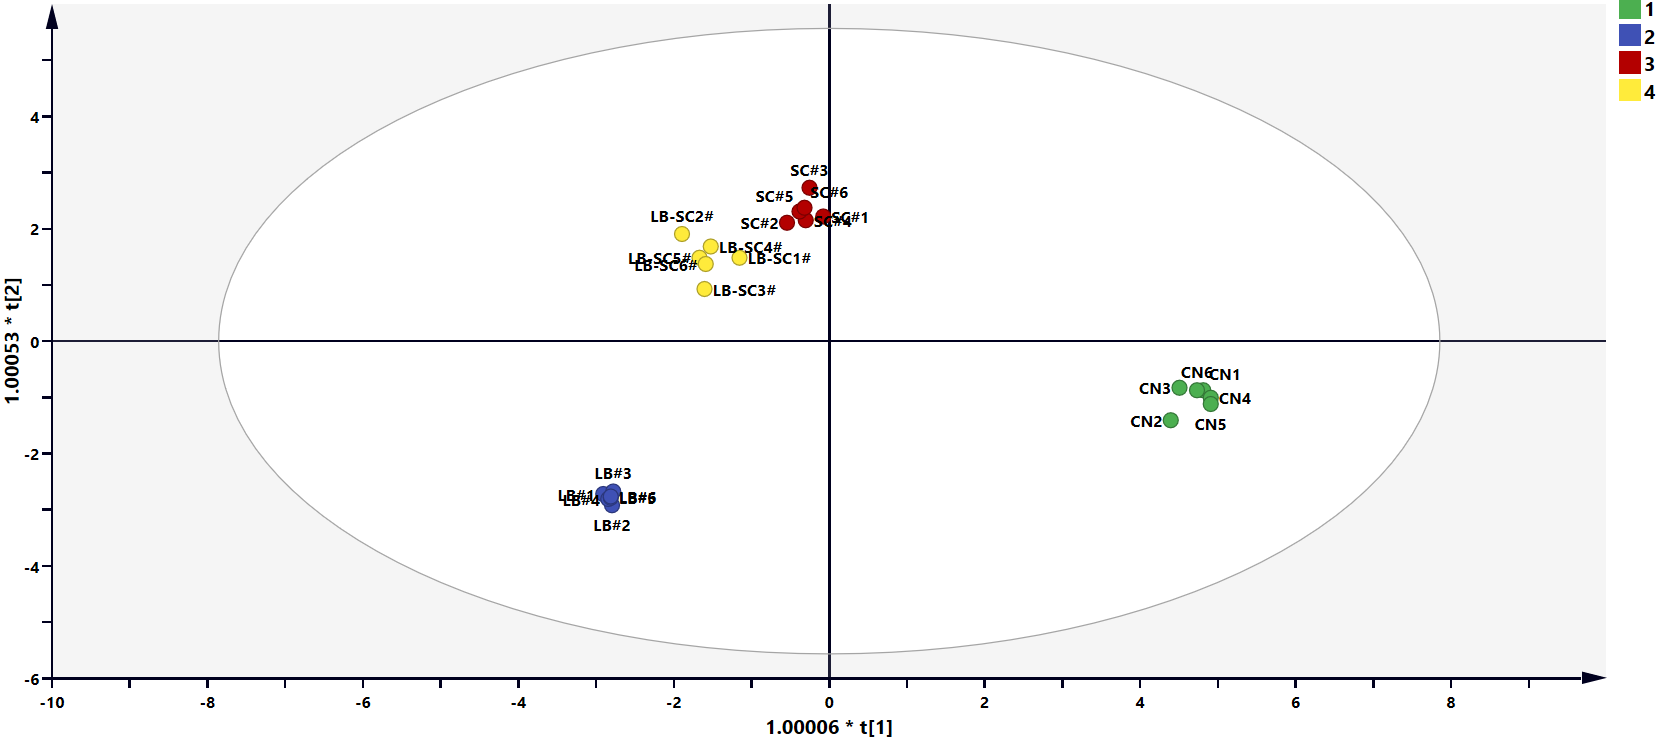


**B**


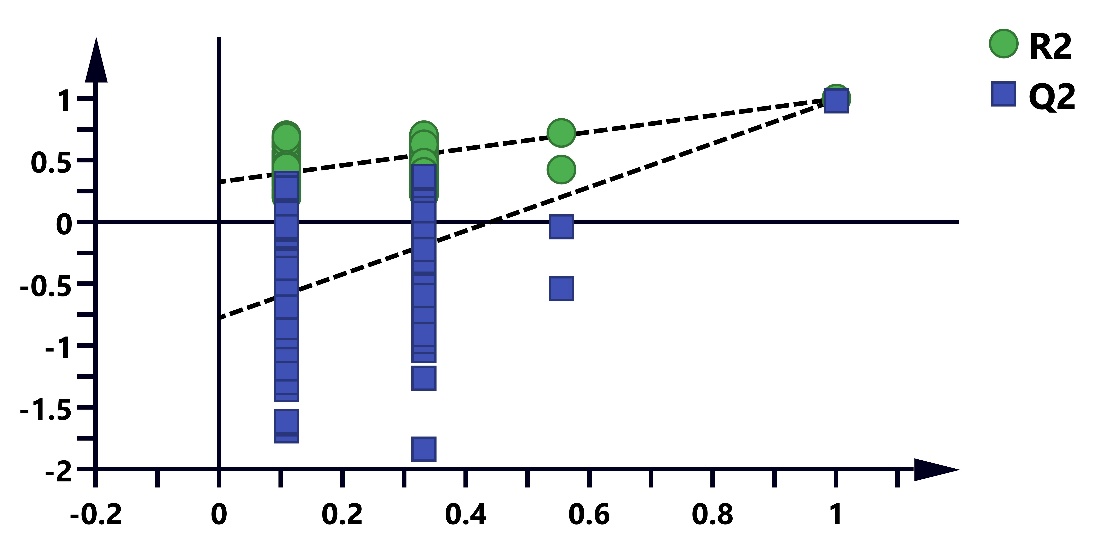


**C**

**
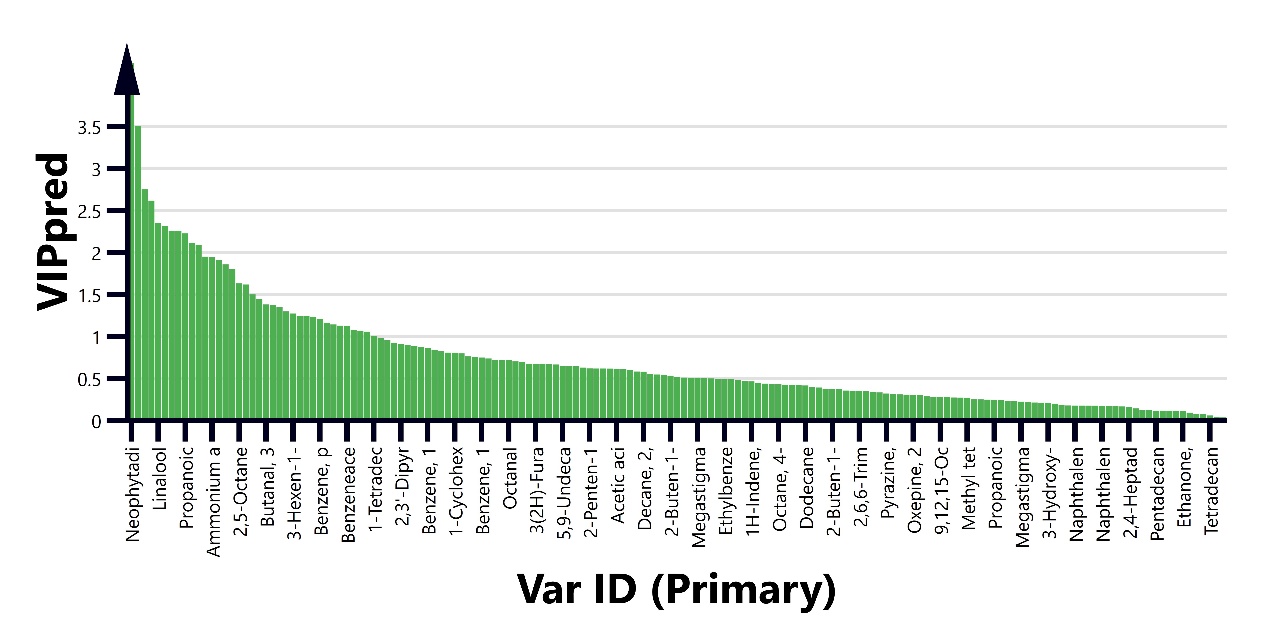
**

**Fig. S1** OPLS-DA analysis for bioaugmentation and control samples: (A) scatter plot of based on relative the content of volatile components; (B) the permutations plot of OPLS-DA model with 200-time permutation tests (the intercepts of R2 and Q2 were 0.997 and 0.988 respectively); (C) VIP value analysis of volatile components.

CN1-6 represented six duplicate controls; LB1-6 represented the six duplicate samples of *B. amyloliquefaciens* LB monoculture. SC1-6 represented the six duplicate samples of *B. kochii SC* monoculture. LS-SC represented the six duplicate samples of *B. amyloliquefaciens LB*-*B. kochii SC* coculture.
